# Supplementary material for: Evaluating the role of CHEK2 p.(Asp438Tyr) allele in inherited breast cancer predisposition
Source: PubMed Central journal article supplement (PMC10276058; doi:10.1007/s10689-023-00327-2), 2023-01-19
Supplement: 10689_2023_327_MOESM1_ESM.pdf [file 10689_2023_327_MOESM1_ESM.pdf]

## Evaluating the role of CHEK2 p.(Asp438Tyr) allele in inherited breast cancer predisposition

### *Familial Cancer*

Timo A. Kumpula<sup>1</sup>, Susanna Koivuluoma<sup>1</sup>, Leila Soikkonen<sup>2</sup>, Sandra Vorimo<sup>1</sup>, Jukka Moilanen<sup>2</sup>,  
Robert Winqvist<sup>1</sup>, Tuomo Mantere<sup>1</sup>, Outi Kuismin<sup>2</sup>, Katri Pylkäs<sup>1</sup>

<sup>1</sup>Laboratory of Cancer Genetics and Tumor Biology, Biocenter Oulu, NordLab Oulu, P.O. Box 5000, FI-90014 University of Oulu, Oulu, Finland

<sup>2</sup>Department of Clinical Genetics, Oulu University Hospital,

Medical Research Center Oulu and PEDEGO Research Unit, University of Oulu, Oulu, Finland

Correspondence to Katri Pylkäs: katri.pylkas@oulu.fi

**Supplementary Table 1.** CHEK2 primers used in the study

| <b>Id</b>                   | <b>Expected product size (bp)</b> | <b>Start Position (Human GRCh37/hg19)</b> | <b>Sequence (5' - 3')</b> |
|-----------------------------|-----------------------------------|-------------------------------------------|---------------------------|
| CHEK2 p.(Asp438Tyr) Forward | 162                               | 22:29091122                               | TGAGACTTCTGCCCAGACTTC     |
| CHEK2 p.(Asp438Tyr) Reverse |                                   | 22:29091264                               | CCACTGAGAATGCCACTTGA      |
| CHEK2 c.1100delC Forward    | 132                               | 22:29091770                               | AGAACTTCAGGCGCCAAGTA      |
| CHEK2 c.1100delC Reverse    |                                   | 22:29091881                               | TGGCAAGTTCAACATTATCC      |

**Supplementary Table 2.** Tumor parameters of *CHEK2* p.(Asp438Tyr) carriers compared with the tumors of non-carriers

| Category           | Mut | %    | WT   | %    | p <sup>a</sup>                           | OR   | 95 % CI    |
|--------------------|-----|------|------|------|------------------------------------------|------|------------|
| <b>T class</b>     |     |      |      |      |                                          |      |            |
| 1                  | 5   | 45.5 | 1143 | 64.0 | 0.219<br>(1 vs. 2. 3. 4)                 | 0.47 | 0.14-1.54  |
| 2                  | 5   | 45.5 | 566  | 31.7 |                                          |      |            |
| 3                  | 0   | 0.0  | 56   | 3.1  |                                          |      |            |
| 4                  | 1   | 9.1  | 20   | 1.1  |                                          |      |            |
| <b>M class</b>     |     |      |      |      |                                          |      |            |
| Neg                | 12  | 100  | 2002 | 97.8 | 1                                        | -    | -          |
| Pos                | 0   | 0    | 45   | 2.2  |                                          |      |            |
| <b>Node status</b> |     |      |      |      |                                          |      |            |
| Neg                | 6   | 50.0 | 1312 | 64.4 | 0.367                                    | 0.55 | 0.18-1.72  |
| Pos                | 6   | 50.0 | 725  | 35.6 |                                          |      |            |
| <b>ER status</b>   |     |      |      |      |                                          |      |            |
| Neg                | 2   | 16.7 | 276  | 14.2 | 0.684                                    | 1.21 | 0.26-5.54  |
| Pos                | 10  | 83.3 | 1666 | 85.8 |                                          |      |            |
| <b>PR status</b>   |     |      |      |      |                                          |      |            |
| Neg                | 2   | 16.7 | 439  | 22.8 | 1                                        | 0.68 | 0.15-3.10  |
| Pos                | 10  | 83.3 | 1485 | 77.2 |                                          |      |            |
| <b>HER2 status</b> |     |      |      |      |                                          |      |            |
| Neg                | 12  | 100  | 1588 | 85.4 | 0.234                                    | -    | -          |
| Pos                | 0   | 0    | 271  | 14.6 |                                          |      |            |
| <b>Grade</b>       |     |      |      |      |                                          |      |            |
| 1 (well diff.)     | 5   | 41.7 | 371  | 18.8 | 0.762<br>(1 and 2 vs. 3)                 | 1.58 | 0.43-5.87  |
| 2 (mod. diff.)     | 4   | 33.3 | 921  | 46.7 |                                          |      |            |
| 3 (poorly diff.)   | 3   | 25.0 | 682  | 34.5 |                                          |      |            |
| <b>Morphology</b>  |     |      |      |      |                                          |      |            |
| Ductal             | 8   | 66.7 | 1588 | 77.9 | 0.095<br>(Lobular vs. all other)         | 2.82 | 0.84-9.42  |
| Lobular            | 4   | 33.3 | 307  | 15.1 |                                          |      |            |
| Medullary          | 0   | 0    | 10   | 0.5  |                                          |      |            |
| Other              | 0   | 0    | 133  | 6.5  |                                          |      |            |
| <b>Type</b>        |     |      |      |      |                                          |      |            |
| LumA               | 10  | 83.3 | 1414 | 76.4 | 0.293<br>(Triple negative vs. all other) | 2.04 | 0.44-9.40  |
| LumB               | 0   | 0    | 193  | 10.4 |                                          |      |            |
| HER2               | 0   | 0    | 78   | 4.2  |                                          |      |            |
| Triple negative    | 2   | 16.7 | 165  | 8.9  |                                          |      |            |
| <b>KI-67 index</b> |     |      |      |      |                                          |      |            |
| 0 (negative)       | 1   | 8.3  | 146  | 7.8  | 0.020<br>(0 and 1 vs. 2 and 3)           | 5.26 | 1.15-24.06 |
| 1 (weak)           | 9   | 75.0 | 765  | 40.9 |                                          |      |            |
| 2 (moderate)       | 1   | 8.3  | 502  | 26.9 |                                          |      |            |
| 3 (strong)         | 1   | 8.3  | 456  | 24.4 |                                          |      |            |

CI confidence interval, ER estrogen receptor, LumA luminalA, LumB luminalB, M primary metastasis, Mut variant carrier, Neg negative, OR odds ratio, Pos positive, PR progesterone receptor, T tumor size, WT wild-type.

<sup>a</sup> Fisher's exact test.
